# Supplementary material for: Unexpected genetic and microbial diversity for arsenic cycling in deep sea cold seep sediments
Source: Springer Nature journal article supplement (doi:10.1038/s41522-023-00382-8), 2023-03-29
Supplement: MOESM1 [file 41522_2023_382_MOESM1_ESM.pdf]

# **Unexpected genetic and microbial diversity for arsenic cycling in deep sea cold seep sediments**

Chuwen Zhang<sup>1</sup>, Xinyue Liu<sup>1, 2</sup>, Ling-Dong Shi<sup>3</sup>, Jiwei Li<sup>4</sup>,

Xi Xiao<sup>5</sup>, Zongze Shao<sup>1, 6</sup>, Xiyang Dong<sup>1, 6 \*</sup>,

<sup>1</sup> Key Laboratory of Marine Genetic Resources, Third Institute of Oceanography, Ministry of Natural Resources, Xiamen, China

<sup>2</sup> School of Marine Sciences, Sun Yat-Sen University, Zhuhai, China

<sup>3</sup> College of Environmental and Resource Sciences, Zhejiang University, Hangzhou, China

<sup>4</sup> Institute of Deep-Sea Science and Engineering, Chinese Academy of Sciences, Sanya, China

<sup>5</sup> Key Laboratory of Marine Mineral Resources, Ministry of Natural Resources, Guangzhou Marine Geological Survey, China Geological Survey, Guangzhou, China

<sup>6</sup> Southern Marine Science and Engineering Guangdong Laboratory (Zhuhai), Zhuhai, China

\* Correspondence can be addressed to Xiyang Dong ([dongxiyang@tio.org.cn](mailto:dongxiyang@tio.org.cn)).

## Supporting Information

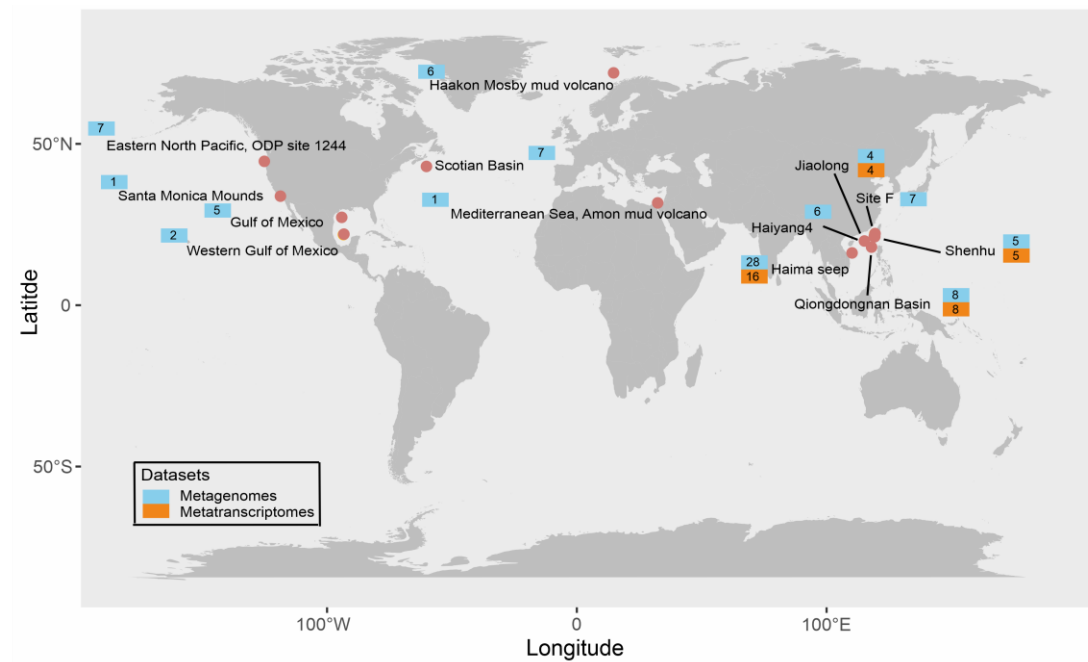

**Supplementary Figure 1.** Geographical distributions of 13 cold seep sites analyzed in this study. Colors indicate the type of samples collected at each site: metagenome (blue); metatranscriptome (orange). The numbers indicate the number of samples for metagenomes or metatranscriptomes. Further details for each metagenome and metatranscriptome can be found in **Supplementary Data 1**.

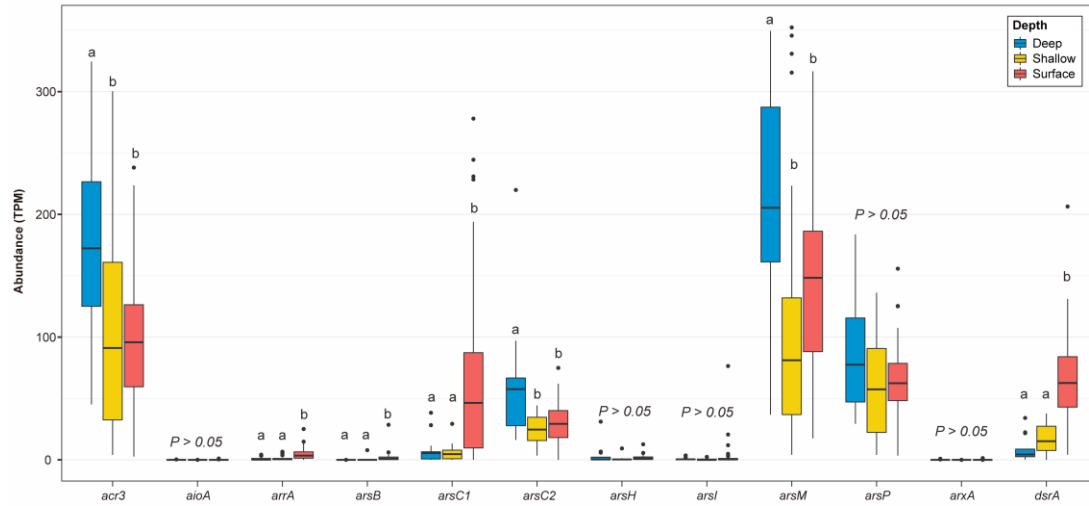

**Supplementary Figure 2.** The abundances of As-cycling gene across different sediment depths with *dsrA* gene as a comparison. One-way analysis of variance (ANOVA) was performed for the comparison, followed by least significant difference (LSD) test. Boxplot components: center line, median values; box limits, upper and lower quartiles; whiskers,  $1.5 \times$  interquartile range; points, outliers.

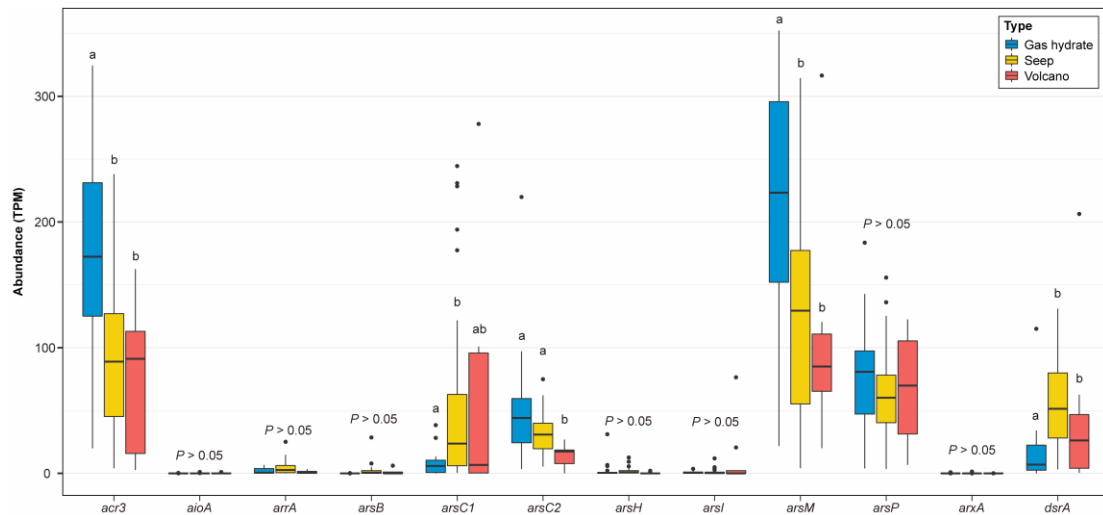

**Supplementary Figure 3.** The abundances of As-cycling gene across different types of cold seep ecosystems with *dsrA* gene as a comparison. One-way analysis of variance (ANOVA) was performed for the comparison, followed by least significant difference (LSD) test. Boxplot components: center line, median values; box limits, upper and lower quartiles; whiskers, 1.5× interquartile range; points, outliers.

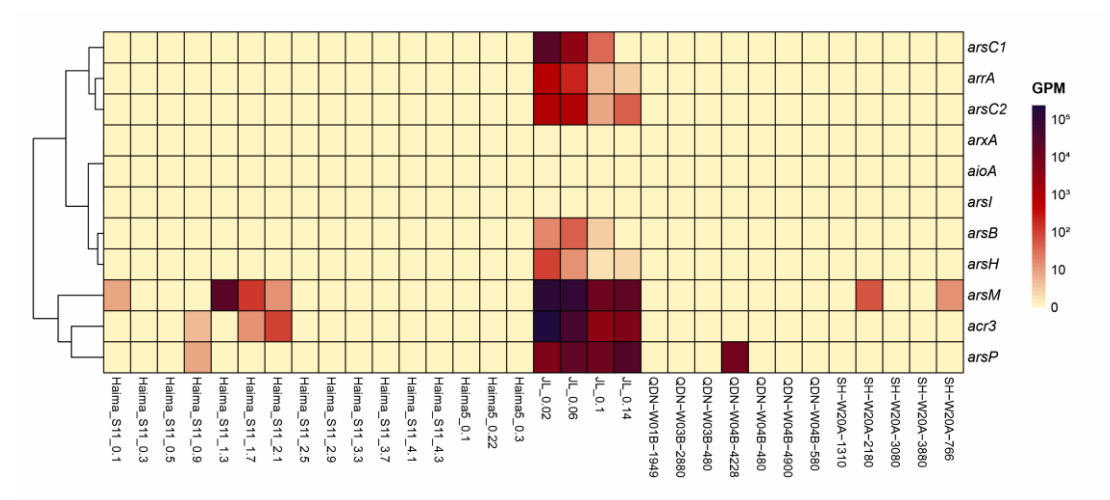

**Supplementary Figure 4.** The abundance of As-cycling transcripts in 33 sediment metatranscriptomes. The transcript abundance of each gene was normalized by the gene length and sequencing depth and represented as TPM (transcripts per million) value.

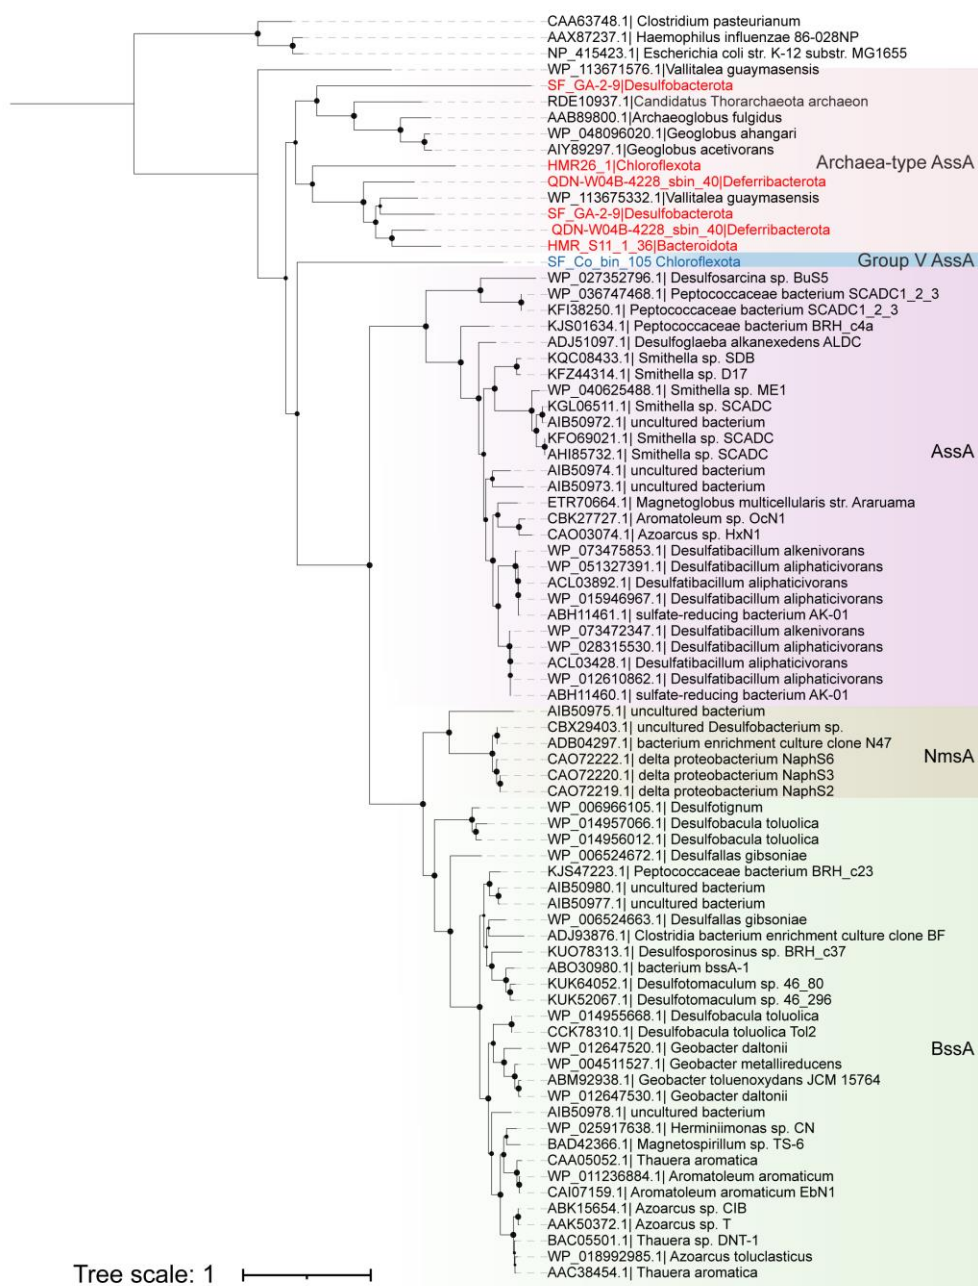

**Supplementary Figure 5.** Phylogenetic analysis of identified AssA protein sequences in *arrA*-carrying MAGs. Bootstrap values >70% are shown as black dots on branch nodes. Scale bar represents amino acid substitutions per site.
